# Supplementary material for: 3D multiscale imaging of human vocal folds using synchrotron X-ray microtomography in phase retrieval mode
Source: PubMed Central journal article supplement (PMC6143640; doi:10.1038/s41598-018-31849-w), 2018-09-18
Supplement: 41598_2018_31849_MOESM1_ESM.pdf [file 41598_2018_31849_MOESM1_ESM.pdf]

# **3D multiscale imaging of human vocal folds using synchrotron X-ray microtomography in phase retrieval mode**

**Lucie Bailly<sup>1,\*</sup>, Thibaud Cochereau<sup>1,2</sup>, Laurent Orgéas<sup>1</sup>, Nathalie Henrich Bernardoni<sup>2</sup>, Sabine Rolland du Roscoat<sup>1</sup>, Anne McLeer-Florin<sup>3</sup>, Yohann Robert<sup>4</sup>, Xavier Laval<sup>2</sup>, Tanguy Laurencin<sup>1</sup>, Philippe Chaffanjon<sup>2,4</sup>, Barbara Fayard<sup>5</sup>, and Elodie Boller<sup>6</sup>**

<sup>1</sup>Univ. Grenoble Alpes, CNRS, Grenoble INP, 3SR, Grenoble, F-38000, France

<sup>2</sup>Univ. Grenoble Alpes, CNRS, Grenoble INP, GIPSA-lab, Grenoble, F-38000, France

<sup>3</sup>Univ. Grenoble Alpes, CHU Grenoble Alpes, CNRS, Grenoble INP, IAB, Grenoble, F-38000, France

<sup>4</sup>Univ. Grenoble Alpes, CHU Grenoble Alpes, LADAF, Grenoble, F-38000, France

<sup>5</sup>Novitom, Grenoble, F-38000, France

<sup>6</sup>ID19 beamline, ESRF - European Synchrotron Radiation Facility, CS40220, Grenoble 38043, France

## **SUPPLEMENTARY INFORMATION**

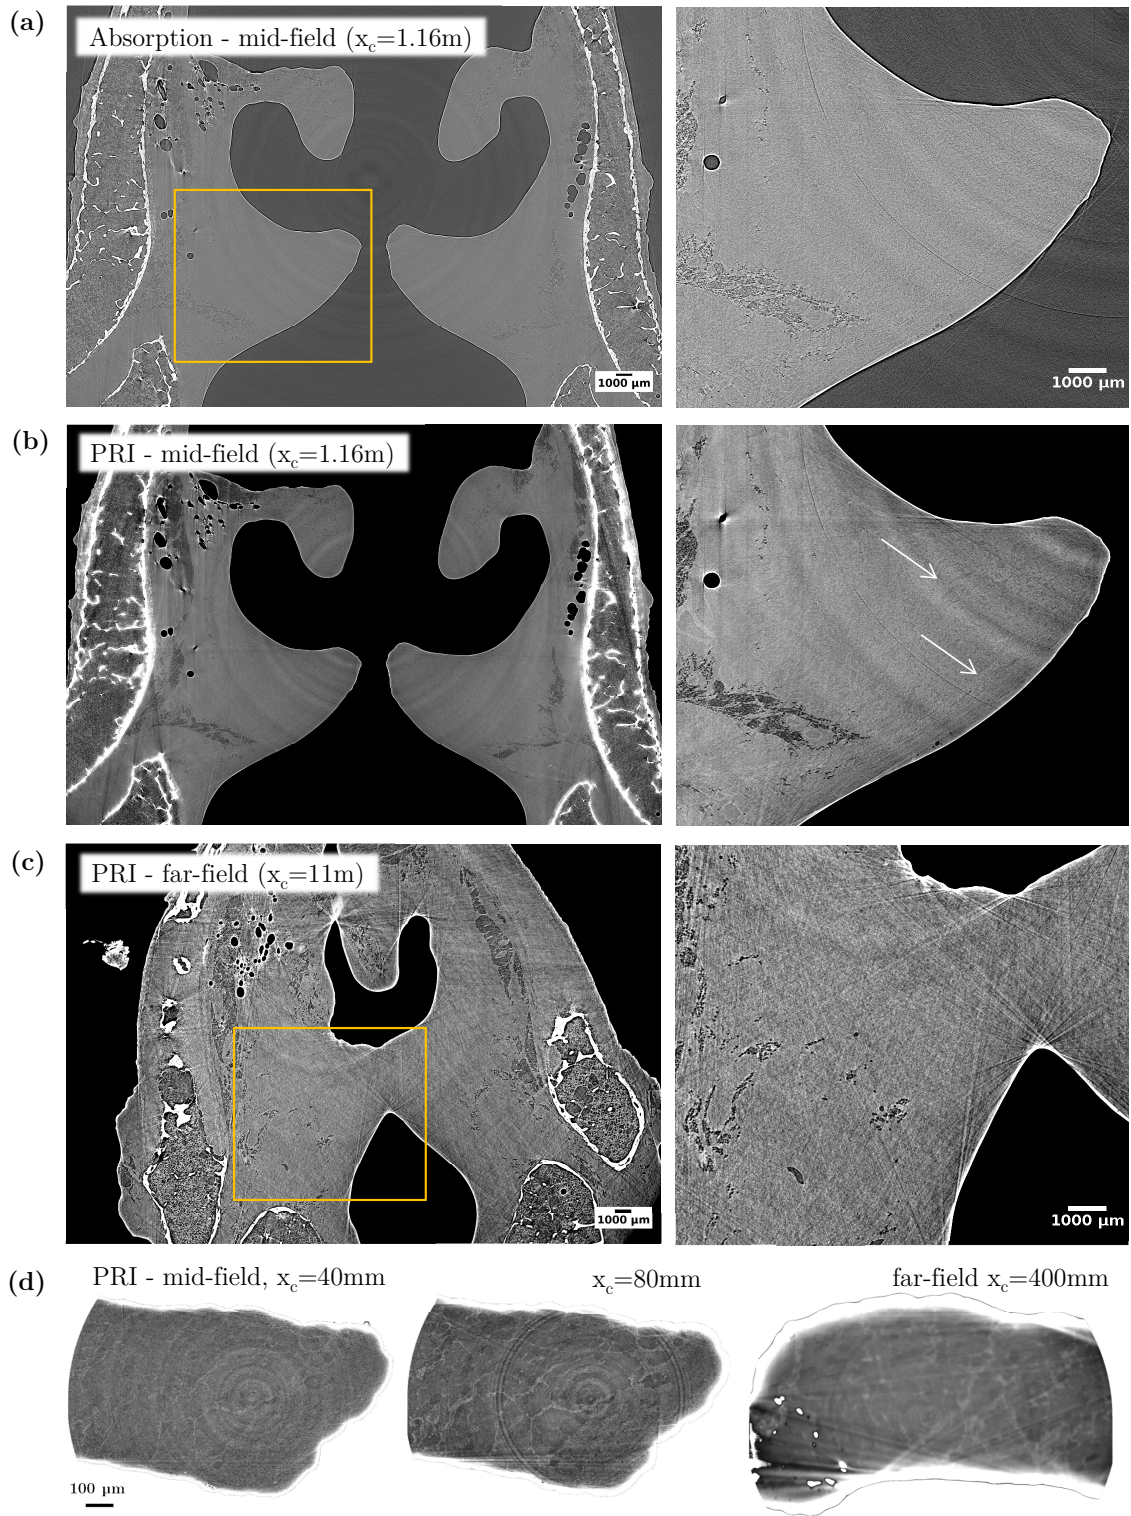

**Figure S1.** Influence of various optical settings on synchrotron X-ray microtomographic images of the database, reconstructed in coronal plane. Experiments on larynges (a), (b)  $L_8$  and (c)  $L_9$ ; on a vocal-fold sample (d)  $L_{10}$ - $S_1$ .

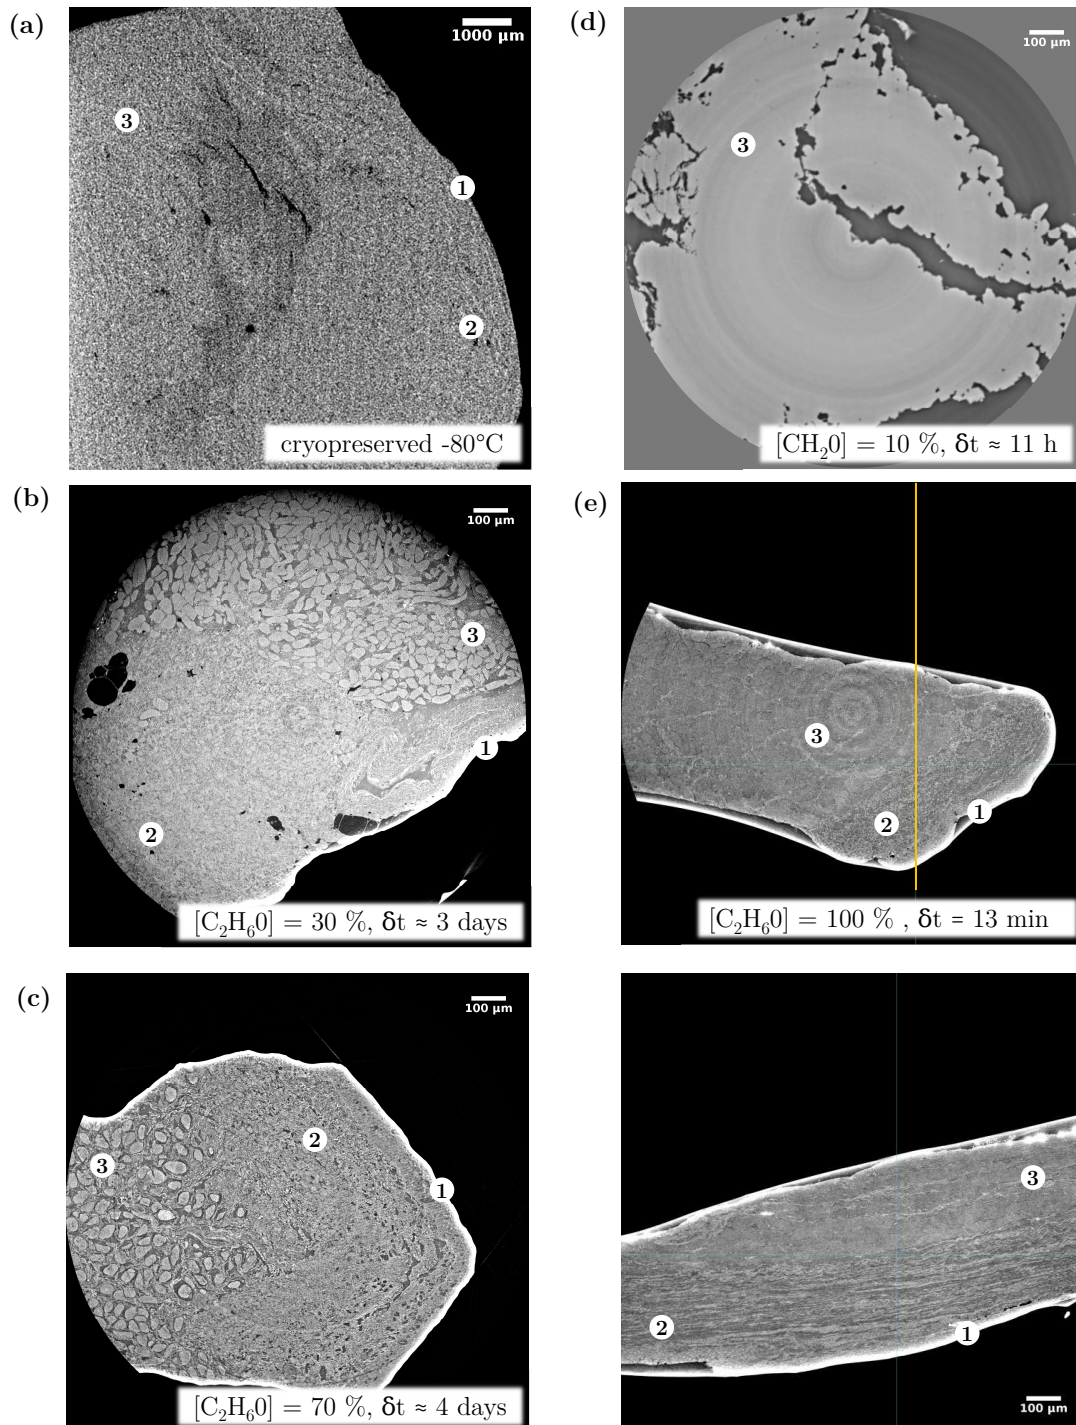

**Figure S2.** Influence of various conditions of tissue conservation and contrast agents on mid-field X-ray microtomographic images of the database. Coronal views of vocal-fold samples (a) L<sub>2</sub>-S<sub>1</sub>, (b) L<sub>6</sub>-S<sub>1</sub>, (c) L<sub>10</sub>-S<sub>3</sub>, (d) L<sub>7</sub>-S<sub>1</sub>. Coronal and perpendicular view (along yellow line) of the vocal-fold sample (e) L<sub>10</sub>-S<sub>4</sub>. ① EP, ② LP, ③ M.

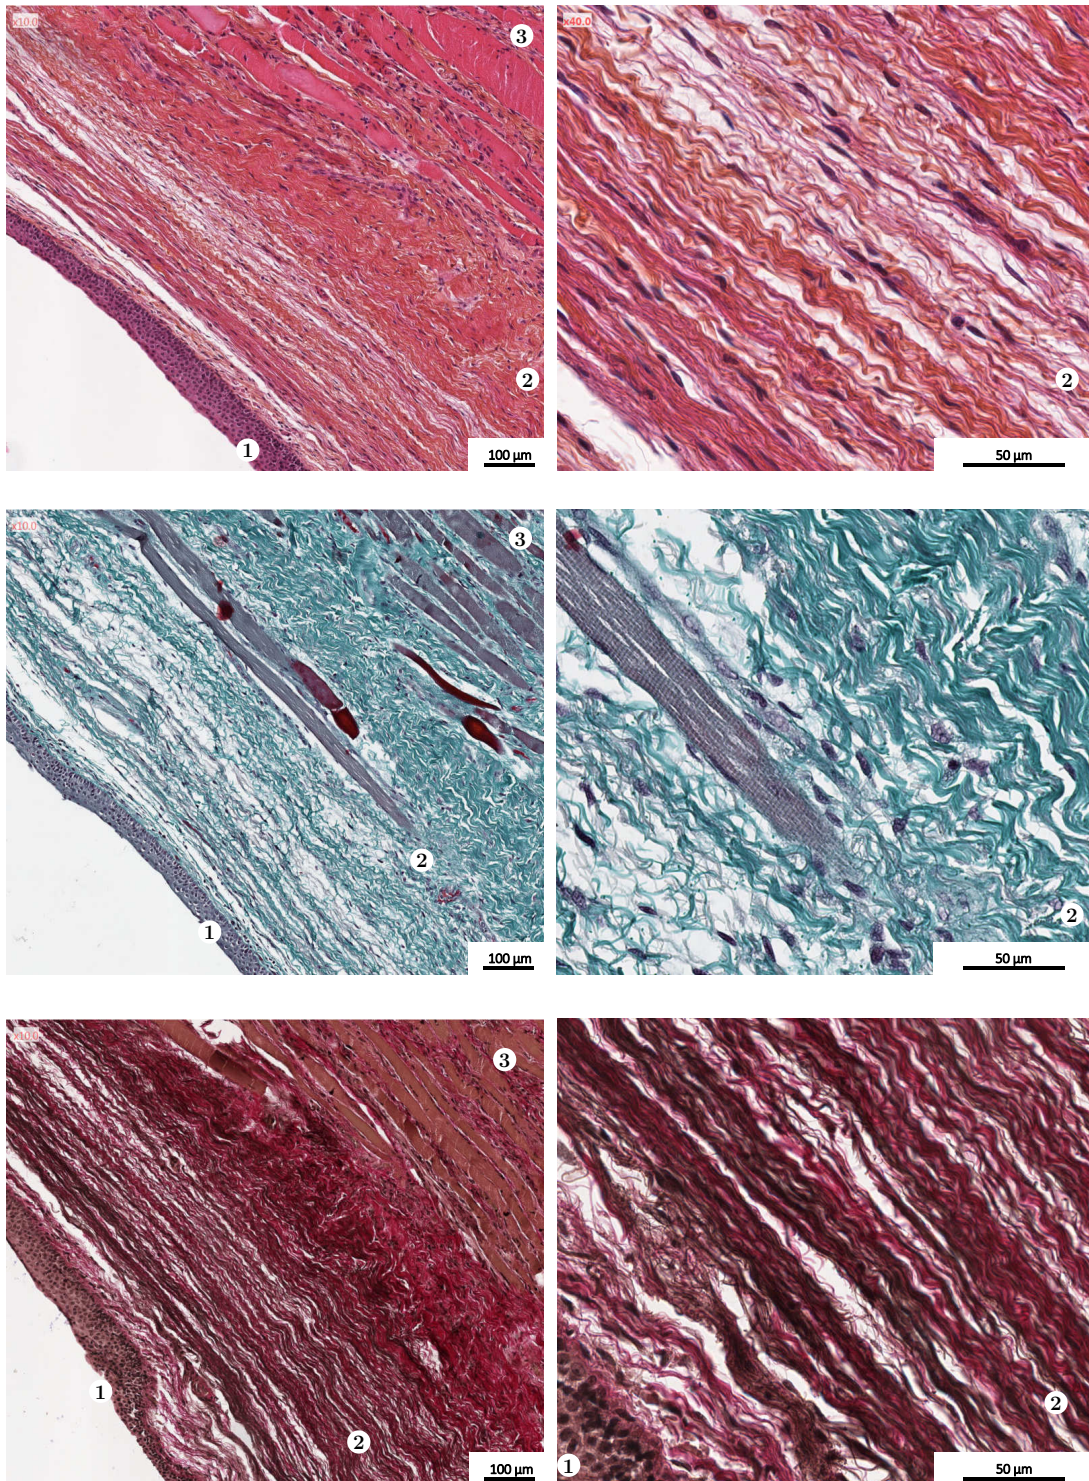

**Figure S3.** Histological photomicrographs of a 2D transversal view of L<sub>10</sub>-S<sub>5</sub>. (*top*) HES stain: collagen fibers (yellow-orange); cytoplasm, striated muscular and elastin fibers (pink); *nuclei* (blue-purple). (*middle*) Masson Trichrome stain: collagen fibers (green); cytoplasm and striated muscular (pink); elastin fibers (gray); *nuclei* (blue-purple). (*bottom*) Elastin stain: elastin fibers (black); ① EP, ② LP, ③ M.

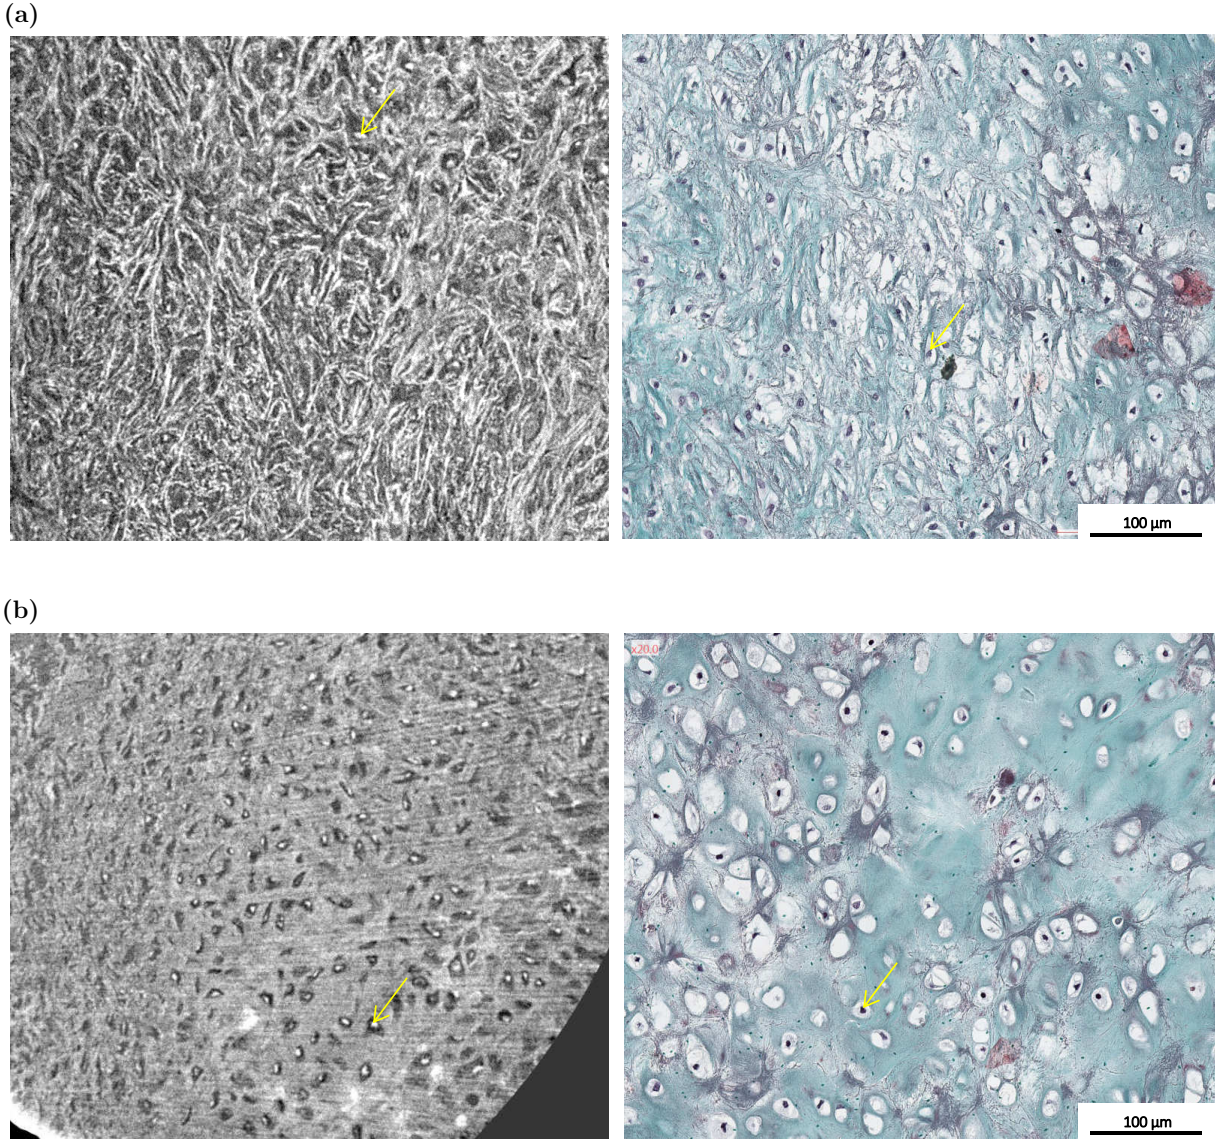

**Figure S4.** Comparison between (a) elastic arytenoid cartilage and (b) hyaline arytenoid cartilage acquired by two imaging modes: (*left*) 2D coronal views of L<sub>10</sub>-S<sub>3</sub> ([C<sub>2</sub>H<sub>6</sub>O] = 70 %), reconstructed from synchrotron high-resolution X-ray microtomographic images (PRI mode); (*right*) 2D histological photomicrographs of L<sub>10</sub>-S<sub>5</sub>. Arrows: chondrocyte (*nucleus*) in *lacuna*.

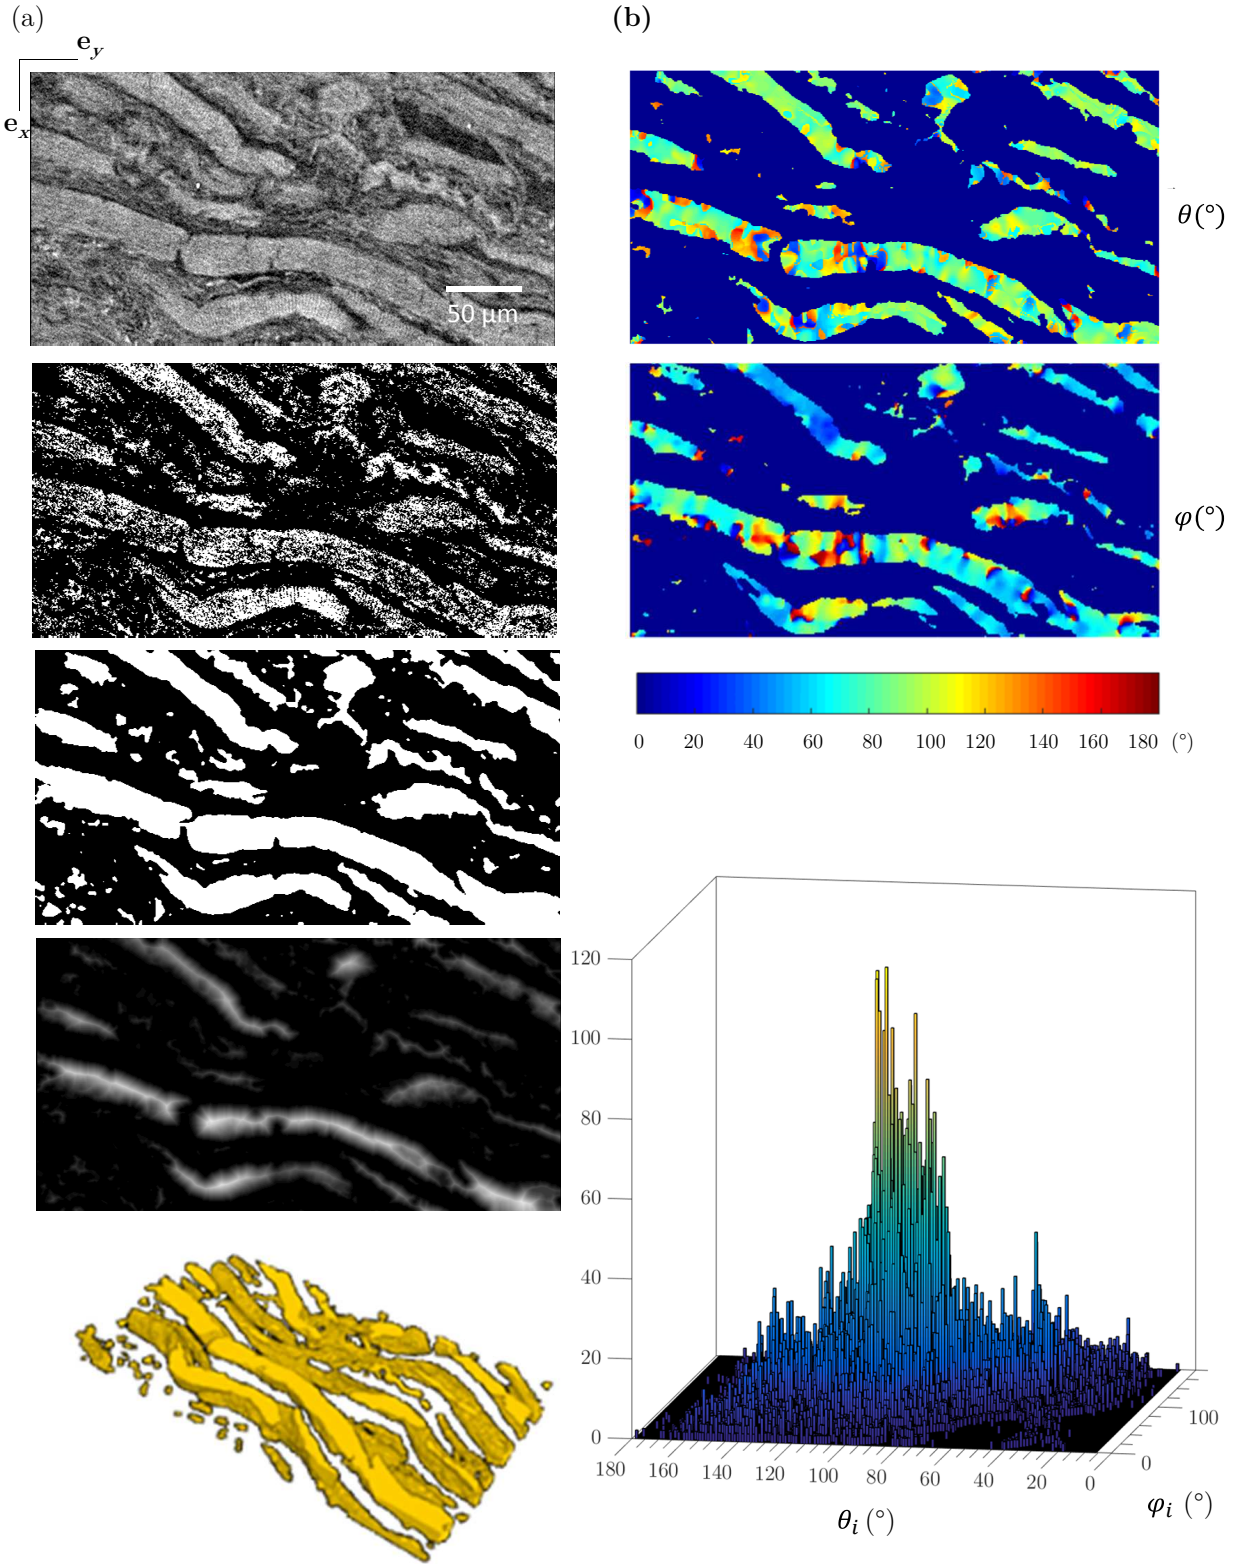

**Figure S5.** Typical quantitative processing of *vocalis* images : (a) Pre-processing operations applied to the images before running 3D orientation algorithms. (b) 3D angular maps and distribution obtained after 3D orientation analyses processed within a whole volume, and displayed for a single slice.

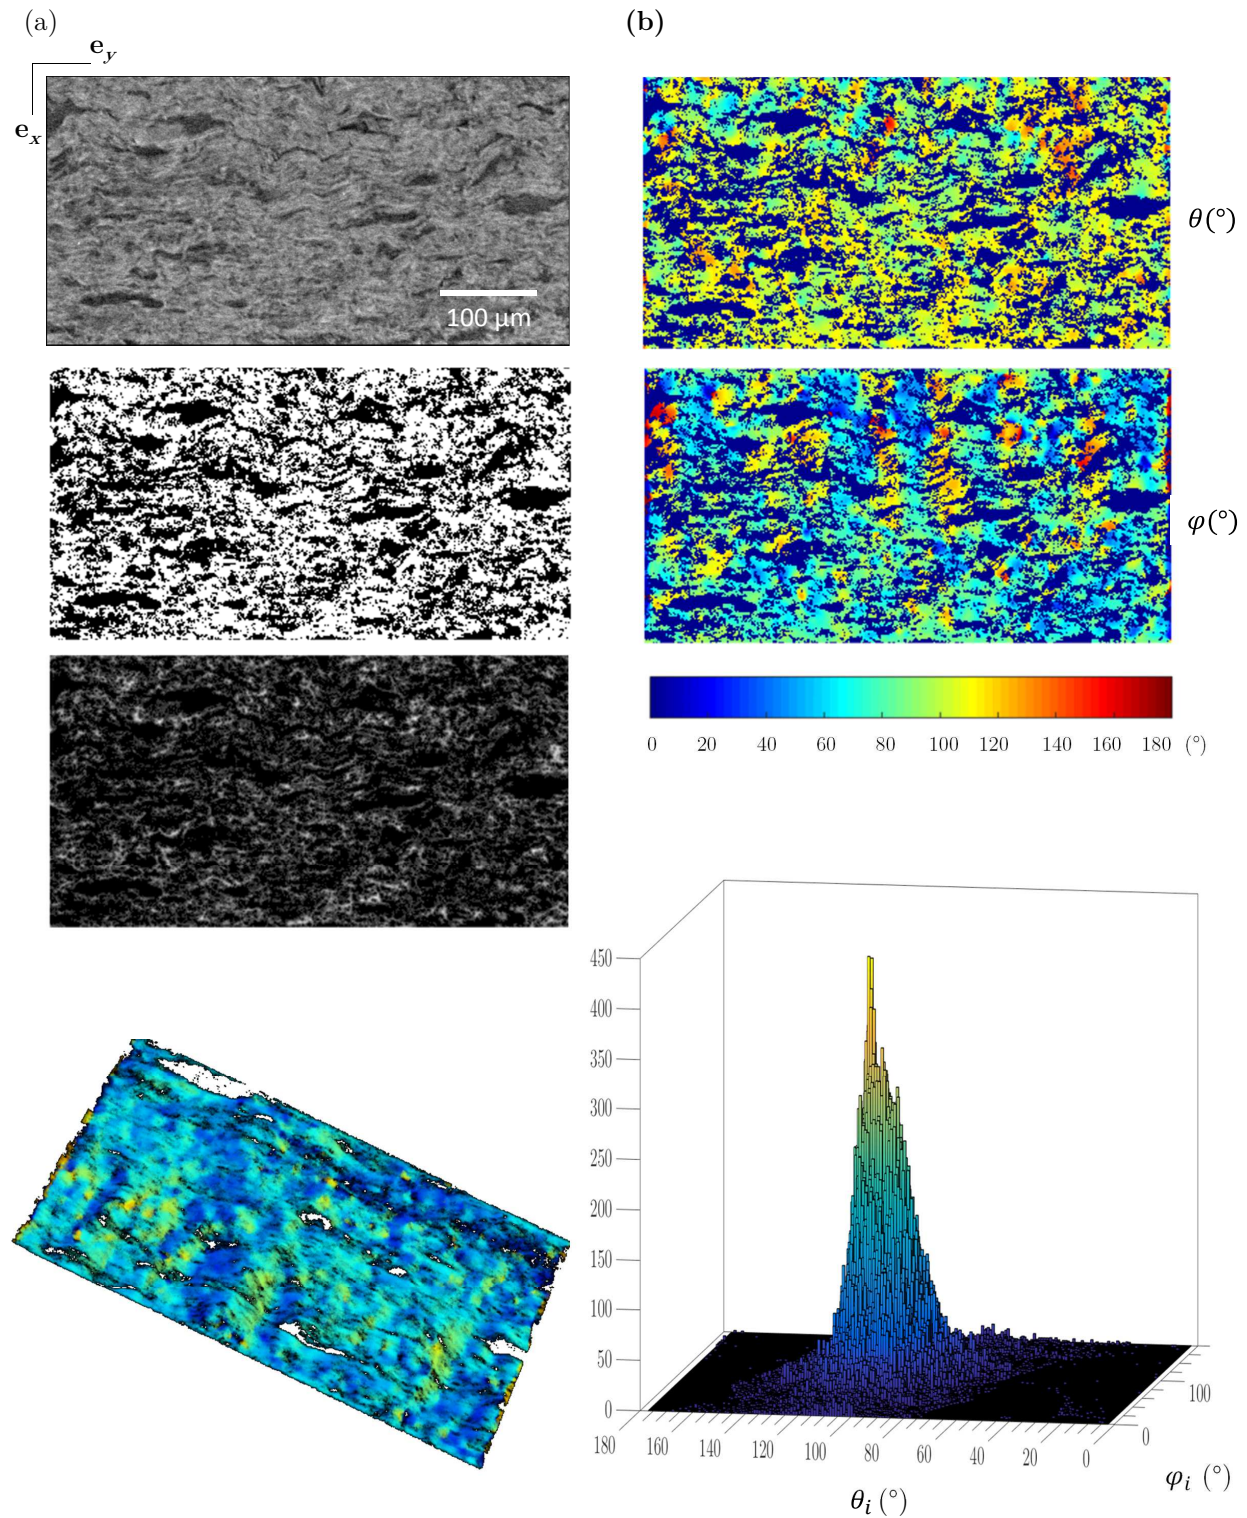

**Figure S6.** Typical quantitative processing of *lamina propria* images : (a) Pre-processing operations applied to the images before running 3D orientation algorithms. (b) 3D angular maps and distribution obtained after 3D orientation analyses processed within a whole volume, and displayed for a single slice.

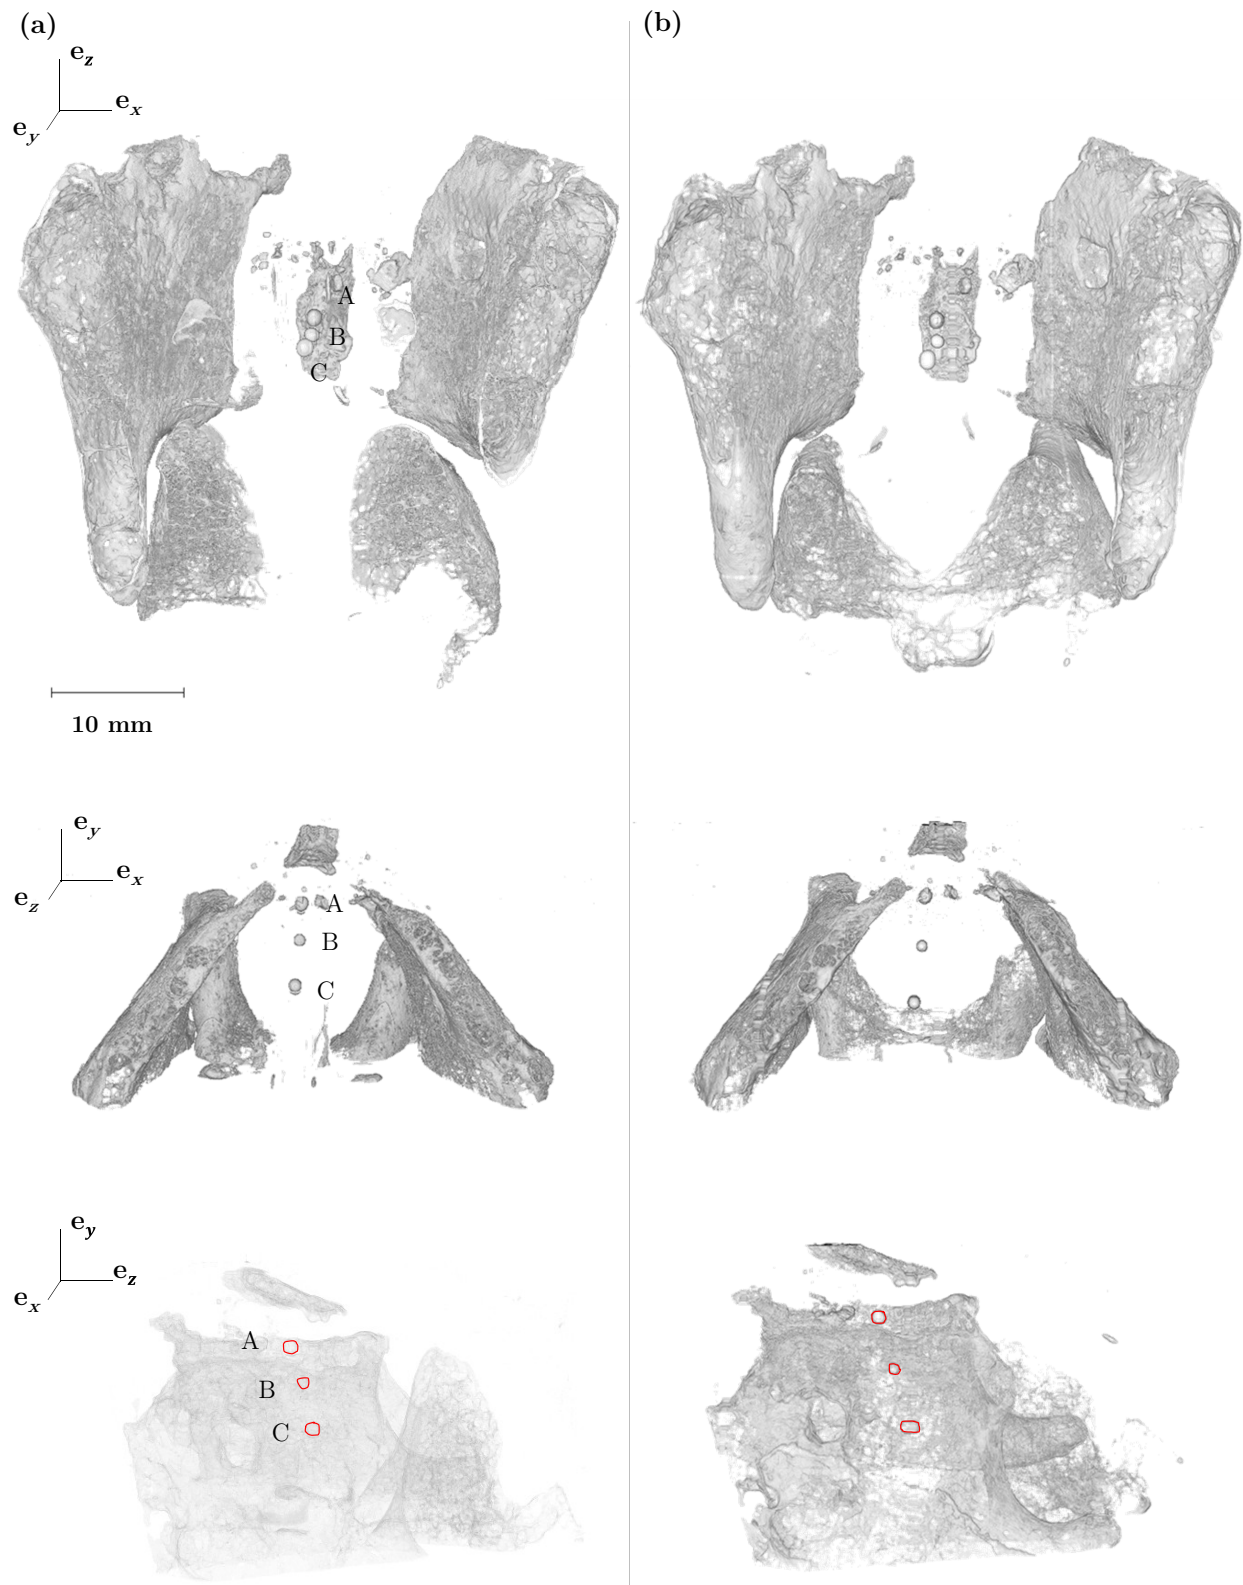

**Figure S7.** 3D reconstructions of larynx  $L_6$  (a) at rest and (b) at the maximal macroscopic stretch of the vocal folds achieved by cricothyroid approximation.



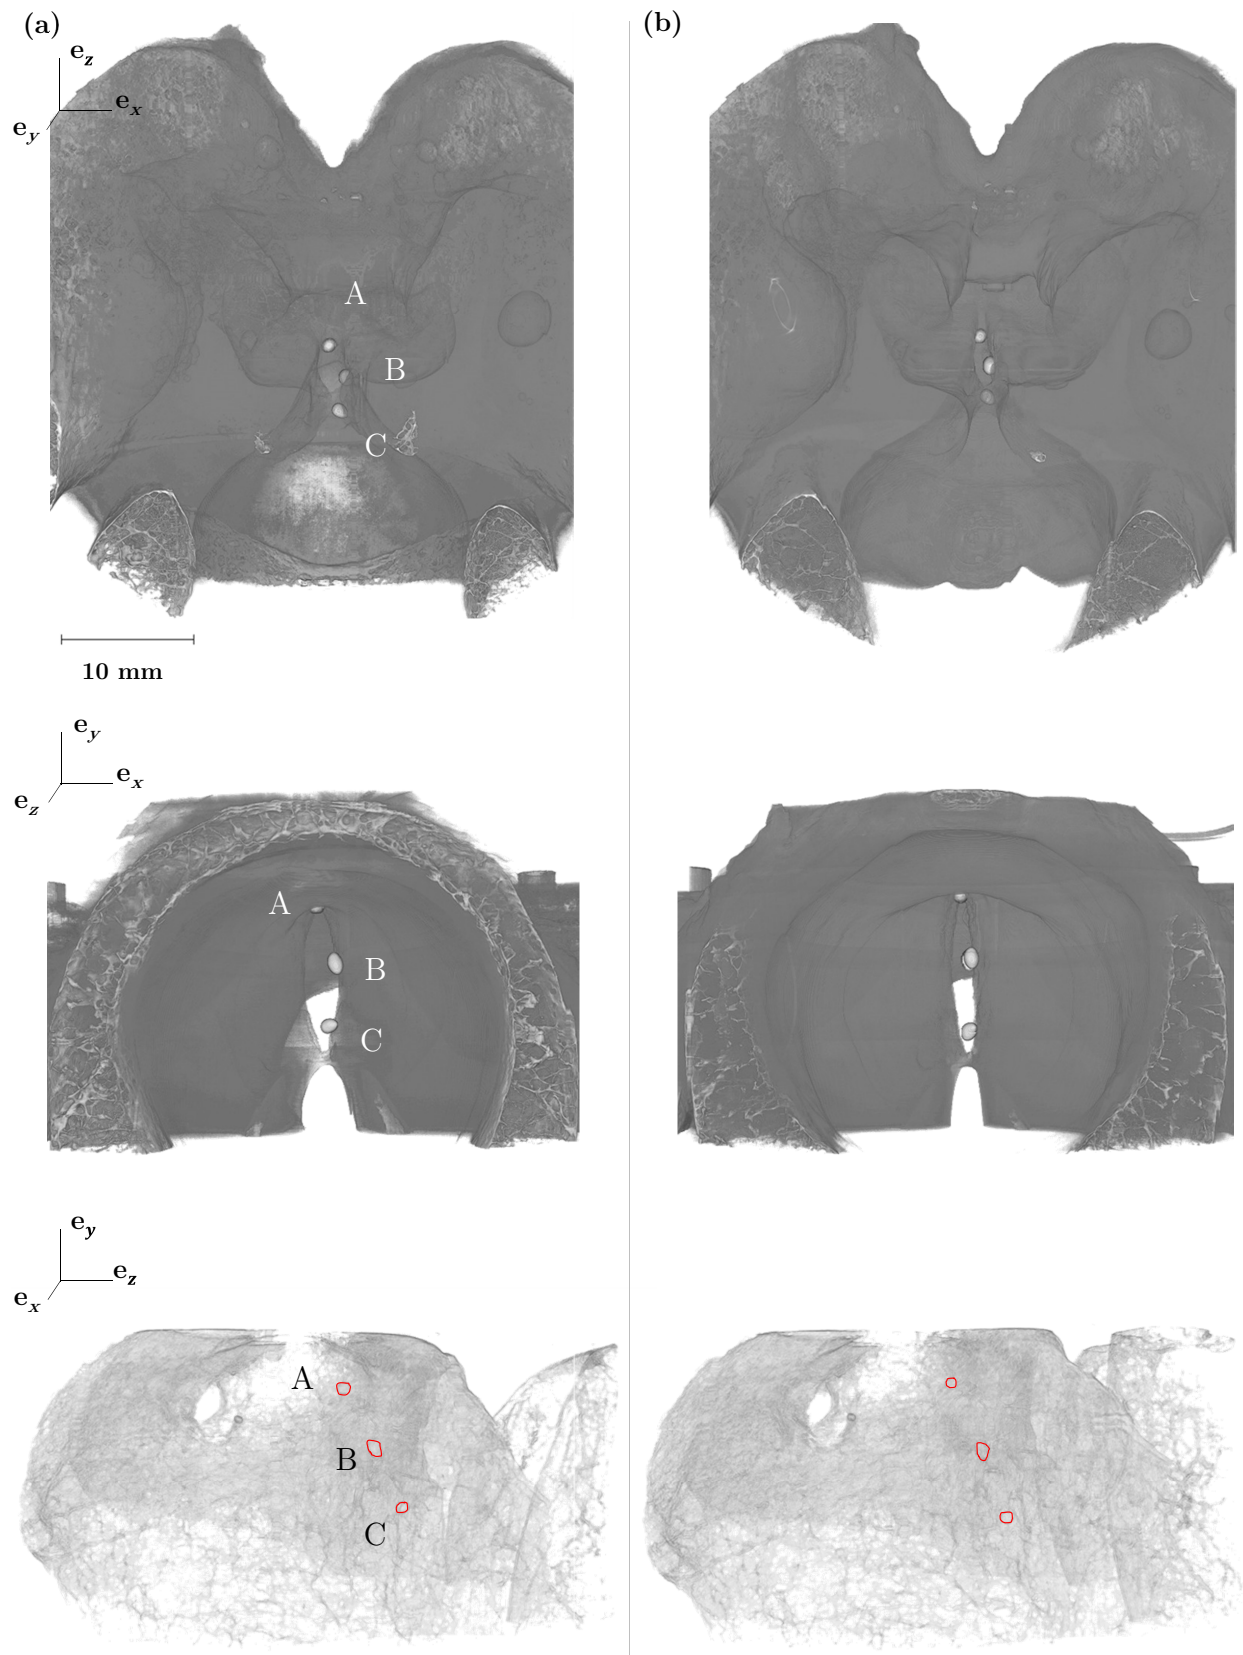

**Figure S8.** 3D reconstructions of larynx  $L_8$  (a) at rest and (b) at the maximal macroscopic stretch of the vocal folds achieved by cricothyroid approximation.
